# Supplementary material
Source: publisher figshare collection journal article supplement (https://diabetesjournals.figshare.com/ndownloader/files/22693388)
Supplement: Supplementary file 1 [file 22693388]

## Sheet: Annotation
Supplementary Table 2 - Proinsulin Interactome in normal human islets
	Description
IU	Normal Human Islets immunoprecipitated by proinsulin specific antibody 20G11-conjugated beads
CU	Normal Human Islets control immunoprecipitation by mouse IgG-conjugated beads
beta	Confirmed expression in single cell RNA-seq data (Ref 22)

## Sheet: Proinsulin_interactome
EID	Protein	Genenames	Proteinnames	foundExp_Crapome	log2FC_IU_vs_CU	pvalue_IU_vs_CU	MSMSCount_CU	MSMSCount_IU	Detection_CU	Detection_IU	Intensity_CU	Intensity_IU	deltaMSMS_IU.CU	cyt_DE_up	FINAL.CLASSIFICATION	beta
10005	O14734	ACOT8	Acyl-coenzyme A thioesterase 8	2	2.09683	4.96774e-05	15	59	6	6	1.5598e+06	3.21102e+06	44	no	Vesicles	yes
10061	Q9UG63	ABCF2	ATP-binding cassette sub-family F member 2	5	1.61134	2.5828e-06	1	18	6	6	835411	1.43314e+06	17	no	Mitochondria	yes
10075	Q7Z6Z7	HUWE1	E3 ubiquitin-protein ligase HUWE1	32	1.04652	1.60866e-07	4	15	4	4	127784	281830	11	no	Degradation	yes
10085	O43854	EDIL3	EGF-like repeat and discoidin I-like domain-containing protein 3	1	1.6612	8.61574e-09	134	274	6	6	3.6417e+06	7.23517e+06	140	no	Secreted	yes
10113	Q9HCU5	PREB	Prolactin regulatory element-binding protein	4	1.05044	7.20879e-06	63	139	6	6	1.05084e+06	2.32625e+06	76	no	Trafficking	yes
10136	P09093	CELA3A	Chymotrypsin-like elastase family member 3A	1	1.26927	0.000349539	17	30	6	6	1.76744e+06	4.58443e+06	13	no	Undefined	yes
1020	Q00535	CDK5	Cyclin-dependent-like kinase 5	15	1.7703	3.59571e-07	2	17	6	5	1.23309e+06	3.39403e+06	15	no	Undefined	yes
10294	O60884	DNAJA2	DnaJ homolog subfamily A member 2	57	1.16961	0.00111545	33	52	6	6	1.10924e+07	1.77526e+07	19	no	Folding	yes
10380	O95861	BPNT1	3(2),5-bisphosphate nucleotidase 1	5	1.28855	3.83715e-07	0	10	5	5	136905	311493	10	no	Undetermined	yes
10399	P63244	GNB2L1	Guanine nucleotide-binding protein subunit beta-2-like 1;Guanine nucleotide-binding protein subunit beta-2-like 1, N-terminally processed	75	1.3061	2.93945e-09	543	868	6	6	7.07822e+06	1.39277e+07	325	no	Nuclear	yes
10432	Q96PK6	RBM14	RNA-binding protein 14	77	1.51897	0.00330011	23	80	6	6	913674	2.39959e+06	57	no	Nuclear	yes
10463	Q6PML9	SLC30A9	Zinc transporter 9	0	1.38752	5.32264e-05	58	113	6	6	3.97091e+06	6.66733e+06	55	no	Cytoskeleton	yes
10528	O00567	NOP56	Nucleolar protein 56	53	1.11444	0.026126	7	25	6	6	259275	310673	18	no	Nuclear	yes
10549	Q13162	PRDX4	Peroxiredoxin-4	101	6.17185	4.92073e-11	1	93	3	6	232841	9.90154e+06	92	no	Degradation	yes
10555	O15120	AGPAT2	1-acyl-sn-glycerol-3-phosphate acyltransferase beta	0	1.49185	0.00353264	2	12	5	6	772156	1.40358e+06	10	no	Undetermined	yes
10562	Q6UX06	OLFM4	Olfactomedin-4	0	1.01076	0.0175045	16	39	6	6	475892	1.63518e+06	23	no	Undetermined	yes
10611	Q96HC4	PDLIM5	PDZ and LIM domain protein 5	8	1.22428	0.010824	11	26	3	6	744118	1.89516e+06	15	no	Cytoskeleton	yes
10612	O75382	TRIM3	Tripartite motif-containing protein 3	0	1.26171	3.65404e-05	30	93	6	6	1.43955e+06	3.15396e+06	63	no	Degradation	yes
10629	Q9Y6J9	TAF6L	TAF6-like RNA polymerase II p300/CBP-associated factor-associated factor 65 kDa subunit 6L	2	1.31372	0.000106678	6	17	5	6	399155	1.10485e+06	11	no	Nuclear	yes
10670	Q7L523	RRAGA	Ras-related GTP-binding protein A	1	1.07475	5.75104e-05	1	11	3	5	1.23852e+06	2.21122e+06	10	no	Trafficking	yes
10726	Q9Y266	NUDC	Nuclear migration protein nudC	47	1.15248	0.00262938	5	20	4	5	149089	335868	15	no	Cytoskeleton	yes
1075	P53634	CTSC	Dipeptidyl peptidase 1;Dipeptidyl peptidase 1 exclusion domain chain;Dipeptidyl peptidase 1 heavy chain;Dipeptidyl peptidase 1 light chain	1	1.70917	0.00235229	5	16	1	2	1.02042e+06	4.98343e+06	11	yes	Secreted	yes
10767	Q9Y450	HBS1L	HBS1-like protein	8	1.02248	0.000167165	33	68	6	6	1.82279e+06	3.39528e+06	35	no	Undetermined	yes
10788	Q13576	IQGAP2	Ras GTPase-activating-like protein IQGAP2	13	1.7789	4.83169e-13	77	229	6	6	2.04739e+06	5.20535e+06	152	no	Cytoskeleton	yes
10908	Q8IY17	PNPLA6	Neuropathy target esterase	6	1.38705	2.57031e-06	46	107	6	6	1.66785e+06	2.88387e+06	61	no	ER	yes
10916	Q9UNF1	MAGED2	Melanoma-associated antigen D2	21	1.49936	0.00053774	6	20	5	6	831505	2.47645e+06	14	no	Nuclear	yes
10949	Q13151	HNRNPA0	Heterogeneous nuclear ribonucleoprotein A0	100	1.51895	8.48226e-07	116	249	6	6	5.0672e+06	1.01709e+07	133	no	Nuclear	yes
10952	P60468	SEC61B	Protein transport protein Sec61 subunit beta	3	1.64511	0.000975677	4	25	6	6	5.52771e+06	1.2819e+07	21	no	ER	yes
10971	P27348	YWHAQ	14-3-3 protein theta	92	1.1764	0.00208845	49	65	6	6	6.90009e+06	1.38094e+07	16	no	Undetermined	yes
10982	Q15555	MAPRE2	Microtubule-associated protein RP/EB family member 2	0	1.23073	2.83512e-05	38	102	6	6	1.95466e+06	3.59925e+06	64	no	Cytoskeleton	yes
10999	Q6P1M0	SLC27A4	Long-chain fatty acid transport protein 4	2	1.42861	5.32661e-10	20	35	6	6	1.69775e+06	3.93546e+06	15	no	Vesicles	yes
11047	Q16186	ADRM1	Proteasomal ubiquitin receptor ADRM1	18	1.38314	1.32189e-05	27	47	6	6	2.76549e+06	4.57758e+06	20	yes	Degradation	yes
11076	O94811	TPPP	Tubulin polymerization-promoting protein	1	1.82421	3.11065e-07	18	43	6	6	3.08824e+06	6.71405e+06	25	no	Cytoskeleton	yes
11100	Q9BUJ2	HNRNPUL1	Heterogeneous nuclear ribonucleoprotein U-like protein 1	66	1.09277	0.0021891	12	28	6	6	1.68666e+06	3.99977e+06	16	no	Undetermined	yes
11187	Q9Y446	PKP3	Plakophilin-3	4	1.53002	9.55019e-06	50	60	6	6	704401	1.38728e+06	10	yes	Plasma Membrane	yes
11188	Q9Y2I1	NISCH	Nischarin	3	1.23173	3.86658e-05	2	12	5	5	132398	446727	10	no	Trafficking	yes
11217	Q9Y2D5	AKAP2	A-kinase anchor protein 2	10	2.03649	0.0408607	0	10	2	3	449890	1.36682e+06	10	no	Cytoskeleton	yes
11261	Q99653	CHP1	Calcineurin B homologous protein 1	0	2.26248	3.80381e-06	9	41	5	6	858125	2.43423e+06	32	no	Vesicles	yes
112724	Q8NBN7	RDH13	Retinol dehydrogenase 13	1	1.15824	0.00031648	24	60	6	6	1.53641e+06	3.9694e+06	36	no	Undetermined	yes
112858	Q96S44	TP53RK	TP53-regulating kinase	4	1.33939	0.0207872	4	16	5	6	884018	3.21106e+06	12	no	Nuclear	yes
11315	Q99497	PARK7	Protein deglycase DJ-1	29	1.00783	0.000860658	79	186	6	6	6.79192e+06	1.3575e+07	107	no	Mitochondria	yes
113251	Q71RC2	LARP4	La-related protein 4	13	1.29965	0.00118503	0	11	5	6	743014	1.28226e+06	11	no	Undetermined	yes
113612	Q7Z449	CYP2U1	Cytochrome P450 2U1	0	1.58396	0.000294335	4	22	5	5	401654	1.1845e+06	18	no	ER	yes
1153	Q14011	CIRBP	Cold-inducible RNA-binding protein	73	2.36621	5.51949e-05	18	48	6	6	3.56994e+06	7.60282e+06	30	no	Nuclear	yes
115817	Q96LJ7	DHRS1	Dehydrogenase/reductase SDR family member 1	0	1.72035	0.000134537	1	19	5	5	678264	2.20996e+06	18	no	Nuclear	yes
116113	Q8IVH2	FOXP4	Forkhead box protein P4	3	1.17908	0.000212868	7	23	5	5	4.13068e+06	6.38899e+06	16	no	Nuclear	yes
1186	P51798	CLCN7	H(+)/Cl(-) exchange transporter 7	0	1.36482	0.000597255	5	21	6	6	780263	2.16788e+06	16	no	Degradation	yes
118881	Q86VU5	COMTD1	Catechol O-methyltransferase domain-containing protein 1	2	1.12773	8.92262e-07	44	66	6	6	5.2151e+06	1.19993e+07	22	no	Golgi	yes
1191	P10909	CLU	Clusterin;Clusterin beta chain;Clusterin alpha chain	6	1.02234	5.91127e-05	185	208	6	6	7.42859e+06	1.33371e+07	23	no	Secreted	yes
123263	Q96DP5	MTFMT	Methionyl-tRNA formyltransferase, mitochondrial	0	2.60404	0.00119645	7	18	3	3	472634	1.45994e+06	11	no	Mitochondria	yes
125950	Q8IY67	RAVER1	Ribonucleoprotein PTB-binding 1	13	1.28846	0.00232764	67	85	6	6	3.76903e+06	7.44871e+06	18	no	Undetermined	yes
1267	P09543	CNP	2,3-cyclic-nucleotide 3-phosphodiesterase	16	1.46112	1.86656e-08	238	451	6	6	7.1271e+06	1.64607e+07	213	no	Undetermined	yes
127262	Q5T0D9	TPRG1L	Tumor protein p63-regulated gene 1-like protein	0	1.9156	0.000165397	14	27	5	5	1.78625e+06	5.42688e+06	13	no	Vesicles	yes
127829	Q96BM9	ARL8A	ADP-ribosylation factor-like protein 8A	1	1.30892	0.00855646	26	49	6	6	1.61379e+06	3.0664e+06	23	no	Undetermined	yes
131118	Q96DA6	DNAJC19	Mitochondrial import inner membrane translocase subunit TIM14	1	1.0512	0.009553	35	76	5	6	1.09271e+06	2.1643e+06	41	no	Folding	yes
132001	Q96BW9	TAMM41	Phosphatidate cytidylyltransferase, mitochondrial	0	2.07988	2.31284e-09	70	160	6	6	1.20729e+06	3.48893e+06	90	no	Mitochondria	yes
1337	P12074	COX6A1	Cytochrome c oxidase subunit 6A1, mitochondrial	2	2.35663	0.000344195	16	45	6	6	6.23097e+06	2.76069e+07	29	no	Mitochondria	yes
1374	P50416	CPT1A	Carnitine O-palmitoyltransferase 1, liver isoform	1	1.00732	1.71751e-06	171	248	6	6	3.28891e+06	7.9496e+06	77	no	Mitochondria	yes
137492	Q8NEZ2	VPS37A	Vacuolar protein sorting-associated protein 37A	0	2.44409	4.9857e-06	7	20	3	5	848082	1.91425e+06	13	no	Trafficking	yes
139322	Q6UXV4	APOOL	MICOS complex subunit MIC27	2	1.38232	1.15068e-11	110	214	6	6	2.52627e+06	7.1853e+06	104	no	Mitochondria	yes
1400	Q14194	CRMP1	Dihydropyrimidinase-related protein 1	20	1.55699	1.92643e-05	17	28	6	6	675510	2.42894e+06	11	no	Cytoskeleton	yes
140823	P60602	ROMO1	Reactive oxygen species modulator 1	0	1.4715	2.64702e-06	10	32	4	5	1.55589e+06	3.20803e+06	22	yes	Mitochondria	yes
143098	Q5T2T1	MPP7	MAGUK p55 subfamily member 7	4	1.83148	7.86555e-05	4	31	5	5	466968	1.29959e+06	27	no	Undetermined	yes
1452	P48729	CSNK1A1	Casein kinase I isoform alpha	12	1.0972	3.54552e-05	16	41	6	6	691694	1.32315e+06	25	no	Cytoskeleton	yes
1476	P04080	CSTB	Cystatin-B	36	1.28662	0.00394738	25	72	4	6	1.0093e+06	3.09508e+06	47	no	Degradation	yes
1508	P07858	CTSB	Cathepsin B;Cathepsin B light chain;Cathepsin B heavy chain	5	1.39782	0.0143468	35	45	6	6	2.41545e+06	3.49532e+06	10	no	Vesicles	yes
152100	Q7Z7K0	CMC1	COX assembly mitochondrial protein homolog	0	1.38828	2.75041e-08	16	42	6	6	2.70832e+06	4.27075e+06	26	no	Mitochondria	yes
1537	P08574	CYC1	Cytochrome c1, heme protein, mitochondrial	8	1.09778	5.11784e-05	92	200	6	6	4.02281e+06	9.37343e+06	108	no	Mitochondria	yes
1593	Q02318	CYP27A1	Sterol 26-hydroxylase, mitochondrial	0	1.63174	4.1726e-05	11	35	6	6	873008	1.40835e+06	24	no	Mitochondria	yes
1655	P17844	DDX5	Probable ATP-dependent RNA helicase DDX5	182	1.17089	0.000149682	60	127	6	6	1.56193e+06	3.47973e+06	67	no	Nuclear	yes
166785	Q8IVH4	MMAA	Methylmalonic aciduria type A protein, mitochondrial	0	1.70526	0.000282944	19	42	6	6	620463	969812	23	yes	Mitochondria	yes
1915	P68104	EEF1A1	Elongation factor 1-alpha 1	0	1.13916	0.00629799	161	293	6	6	5.09135e+07	9.04111e+07	132	no	Protein synthesis	yes
1962	Q08426	EHHADH	Peroxisomal bifunctional enzyme;Enoyl-CoA hydratase/3,2-trans-enoyl-CoA isomerase;3-hydroxyacyl-CoA dehydrogenase	0	1.23022	2.79727e-07	128	262	6	6	1.78499e+06	4.17826e+06	134	no	Degradation	yes
1975	P23588	EIF4B	Eukaryotic translation initiation factor 4B	111	3.97518	0.00079298	0	26	2	6	891073	1.15299e+07	26	no	Protein synthesis	yes
1983	P55010	EIF5	Eukaryotic translation initiation factor 5	9	2.52977	4.72307e-05	14	24	6	6	686699	4.12556e+06	10	no	Protein synthesis	yes
1994	Q15717	ELAVL1	ELAV-like protein 1	65	1.43109	1.21853e-05	152	254	6	6	3.58773e+06	6.7088e+06	102	no	Undetermined	yes
200186	Q53ET0	CRTC2	CREB-regulated transcription coactivator 2	0	1.59999	0.00781423	7	21	4	4	1.50001e+06	3.71507e+06	14	no	Nuclear	yes
2109	P38117	ETFB	Electron transfer flavoprotein subunit beta	10	1.8774	1.73808e-10	79	168	6	6	1.7496e+06	2.96168e+06	89	no	Mitochondria	yes
2130	Q01844	EWSR1	RNA-binding protein EWS	99	1.25718	0.0134715	11	51	6	6	3.06432e+06	5.83335e+06	40	yes	Undetermined	yes
2193	Q9Y285	FARSA	Phenylalanine--tRNA ligase alpha subunit	30	1.41944	1.64369e-09	333	571	6	6	9.3824e+06	1.93107e+07	238	no	Undetermined	yes
22	O75027	ABCB7	ATP-binding cassette sub-family B member 7, mitochondrial	3	1.11351	1.86041e-05	29	54	6	6	1.19655e+06	2.25177e+06	25	no	Mitochondria	yes
220988	P51991	HNRNPA3	Heterogeneous nuclear ribonucleoprotein A3	124	1.29644	0.000160042	85	133	6	6	5.69293e+06	1.15455e+07	48	no	Undetermined	yes
221092	Q1KMD3	HNRNPUL2	Heterogeneous nuclear ribonucleoprotein U-like protein 2	33	1.11454	0.00223555	71	149	6	6	2.14151e+06	4.67232e+06	78	no	Nuclear	yes
2232	P22570	FDXR	NADPH:adrenodoxin oxidoreductase, mitochondrial	5	1.23625	9.54794e-07	62	97	6	6	2.72222e+06	5.566e+06	35	no	Mitochondria	yes
22803	Q9H0D6	XRN2	5-3 exoribonuclease 2	50	1.42352	3.53628e-05	15	46	6	6	945603	3.28635e+06	31	no	Nuclear	yes
22827	Q9UHX1	PUF60	Poly(U)-binding-splicing factor PUF60	93	4.93318	5.19879e-10	11	24	6	6	1.58977e+06	1.02667e+07	13	no	Nuclear	yes
22848	Q2M2I8	AAK1	AP2-associated protein kinase 1	3	1.19932	8.51e-08	56	124	6	6	1.83969e+06	3.74789e+06	68	no	Plasma Membrane	yes
22884	Q9Y2I8	WDR37	WD repeat-containing protein 37	0	1.36273	1.84462e-05	8	30	6	6	1.03378e+06	2.25905e+06	22	no	Cytoskeleton	yes
22907	Q7L2E3	DHX30	Putative ATP-dependent RNA helicase DHX30	42	1.26515	3.77408e-05	18	53	6	6	265698	526003	35	no	Mitochondria	yes
23	Q8NE71	ABCF1	ATP-binding cassette sub-family F member 1	43	1.44501	8.77561e-07	27	90	6	6	2.60152e+06	5.181e+06	63	no	Protein synthesis	yes
23011	Q9UL25	RAB21	Ras-related protein Rab-21	6	1.22623	3.50018e-06	90	169	6	6	1.59754e+06	3.21236e+06	79	yes	Trafficking	yes
23071	Q9BS26	ERP44	Endoplasmic reticulum resident protein 44	10	1.58507	1.91269e-06	79	135	6	6	3.73341e+06	7.1555e+06	56	no	Folding	yes
23151	Q6IC98	GRAMD4	GRAM domain-containing protein 4	0	1.07856	6.92452e-05	8	24	5	6	1.28957e+06	2.56421e+06	16	yes	Mitochondria	yes
2316	P21333	FLNA	Filamin-A	158	1.09499	0.00820087	18	28	5	6	681098	7.62663e+06	10	no	Plasma Membrane	yes
2317	O75369	FLNB	Filamin-B	108	1.0189	0.00215254	39	94	6	6	485306	1.48871e+06	55	no	Cytoskeleton	yes
23172	Q15018	FAM175B	BRISC complex subunit Abro1	0	1.06012	2.98468e-05	15	30	6	6	533880	1.17609e+06	15	no	Undetermined	yes
23185	Q92615	LARP4B	La-related protein 4B	5	1.28859	2.53164e-05	36	50	6	6	1.41149e+06	3.47904e+06	14	no	Undetermined	yes
23193	Q14697	GANAB	Neutral alpha-glucosidase AB	63	1.03564	1.78923e-07	38	55	6	6	980934	2.46881e+06	17	no	ER	yes
23196	Q9NZB2	FAM120A	Constitutive coactivator of PPAR-gamma-like protein 1	15	1.28449	4.69935e-09	188	426	6	6	3.40766e+06	7.23165e+06	238	no	Undetermined	yes
23197	Q96CS3	FAF2	FAS-associated factor 2	6	1.37705	5.75002e-08	122	200	6	6	3.68626e+06	7.97174e+06	78	no	ERAD	yes
23242	O75128	COBL	Protein cordon-bleu	1	1.11812	0.000874652	2	20	5	6	693817	2.29661e+06	18	no	Plasma Membrane	yes
23303	Q9NQT8	KIF13B	Kinesin-like protein KIF13B	0	1.2955	3.94257e-05	68	117	6	6	1.39042e+06	3.10115e+06	49	no	Plasma Membrane	yes
23312	Q8TDJ6	DMXL2	DmX-like protein 2	0	1.20577	8.60588e-05	41	108	6	6	664985	1.26985e+06	67	no	Vesicles	yes
23335	Q9Y4E6	WDR7	WD repeat-containing protein 7	2	1.05101	1.79353e-10	118	215	6	6	1.05967e+06	2.39452e+06	97	no	Vesicles	yes
23367	Q6PKG0	LARP1	La-related protein 1	0	1.00299	0.00197068	59	91	6	5	1.26264e+06	3.13284e+06	32	no	Nuclear	yes
23387	Q9Y2K2	SIK3	Serine/threonine-protein kinase SIK3	1	1.23306	0.00134526	6	20	5	6	649380	1.69128e+06	14	no	Nuclear	yes
23408	Q9NXA8	SIRT5	NAD-dependent protein deacylase sirtuin-5, mitochondrial	0	1.8519	0.00646075	0	12	2	6	287918	793611	12	no	Stress response	yes
23424	Q8NHU6	TDRD7	Tudor domain-containing protein 7	0	1.21242	0.00143318	6	18	6	6	177188	3.41973e+06	12	yes	Undetermined	yes
23435	Q13148	TARDBP	TAR DNA-binding protein 43	42	1.08641	0.000383321	98	158	6	6	6.80967e+06	1.52082e+07	60	no	Nuclear	yes
23463	O60725	ICMT	Protein-S-isoprenylcysteine O-methyltransferase	1	1.46097	6.11918e-08	2	14	6	6	594867	1.6091e+06	12	no	ER	yes
23589	Q9Y2V2	CARHSP1	Calcium-regulated heat stable protein 1	1	1.17498	0.0183509	11	24	5	6	1.48617e+06	4.44057e+06	13	yes	Undetermined	yes
23597	Q9Y305	ACOT9	Acyl-coenzyme A thioesterase 9, mitochondrial	2	1.10959	0.00208451	47	111	6	6	1.68771e+06	5.51544e+06	64	no	Mitochondria	yes
23753	Q9HCN8	SDF2L1	Stromal cell-derived factor 2-like protein 1	4	1.06877	0.0118093	84	140	6	6	4.2512e+06	8.14967e+06	56	no	Vesicles	yes
23761	Q9UG56	PISD	Phosphatidylserine decarboxylase proenzyme;Phosphatidylserine decarboxylase alpha chain;Phosphatidylserine decarboxylase beta chain	0	1.33908	5.84307e-06	27	52	6	6	284466	698211	25	no	Golgi	yes
23787	Q9NZJ7	MTCH1	Mitochondrial carrier homolog 1	13	1.02917	0.0001447	78	130	6	6	2.50052e+06	4.7811e+06	52	no	Mitochondria	yes
24139	O95834	EML2	Echinoderm microtubule-associated protein-like 2	2	1.02661	0.00124358	41	145	6	6	968001	2.12036e+06	104	no	Vesicles	yes
2539	P11413	G6PD	Glucose-6-phosphate 1-dehydrogenase	14	1.12491	4.10046e-05	62	115	6	6	1.33005e+06	3.47742e+06	53	yes	Stress response	yes
255743	Q6UXI9	NPNT	Nephronectin	0	2.10629	0.01988	0	13	1	3	80542.2	280925	13	no	Undetermined	yes
25797	Q16769	QPCT	Glutaminyl-peptide cyclotransferase	51	1.38895	2.37652e-05	66	127	6	6	1.2302e+07	2.2889e+07	61	no	Secreted	yes
25873	Q9Y3U8	RPL36	60S ribosomal protein L36	78	1.48381	0.0227268	7	21	4	6	1.59729e+06	2.47806e+06	14	no	Protein synthesis	yes
25874	O95563	MPC2	Mitochondrial pyruvate carrier 2	1	1.22915	0.000635312	29	65	6	6	3.03142e+06	7.14494e+06	36	no	Mitochondria	yes
25939	Q9Y3Z3	SAMHD1	Deoxynucleoside triphosphate triphosphohydrolase SAMHD1	13	1.11002	7.01728e-08	94	187	6	6	1.31078e+06	2.5494e+06	93	no	Nuclear	yes
25979	Q6IAN0	DHRS7B	Dehydrogenase/reductase SDR family member 7B	4	1.29264	2.24257e-05	4	21	6	6	1.06982e+06	2.65082e+06	17	no	Undetermined	yes
26090	Q8N2K0	ABHD12	Monoacylglycerol lipase ABHD12	1	1.09204	3.1172e-06	74	152	6	6	2.1488e+06	4.8336e+06	78	no	Metabolism	yes
26092	Q5JTV8	TOR1AIP1	Torsin-1A-interacting protein 1	4	1.41521	1.3916e-05	39	82	6	6	1.27399e+06	3.13957e+06	43	no	Undetermined	yes
26119	Q5SW96	LDLRAP1	Low density lipoprotein receptor adapter protein 1	0	2.4943	3.07538e-05	2	19	5	6	937336	1.59104e+06	17	no	Trafficking	yes
26135	Q8NC51	SERBP1	Plasminogen activator inhibitor 1 RNA-binding protein	108	1.10119	0.00386344	41	103	6	6	9.70235e+06	2.14275e+07	62	no	Undetermined	yes
2620	O43903	GAS2	Growth arrest-specific protein 2	5	1.25006	0.000535851	3	35	6	6	2.54584e+06	5.29843e+06	32	no	Cytoskeleton	yes
26275	Q6NVY1	HIBCH	3-hydroxyisobutyryl-CoA hydrolase, mitochondrial	2	1.12509	0.000279151	23	54	4	5	2.92268e+06	4.75962e+06	31	no	Metabolism	yes
26286	Q9NP61	ARFGAP3	ADP-ribosylation factor GTPase-activating protein 3	1	1.70169	0.00452333	2	18	2	2	537897	1.68648e+06	16	no	Undetermined	yes
2641	P01275	GCG	Glucagon;Glicentin;Glicentin-related polypeptide;Oxyntomodulin;Glucagon;Glucagon-like peptide 1;Glucagon-like peptide 1(7-37);Glucagon-like peptide 1(7-36);Glucagon-like peptide 2	0	1.13654	0.0376358	130	164	6	6	7.98097e+06	1.34814e+07	34	no	Secreted	yes
2673	Q06210	GFPT1	Glutamine--fructose-6-phosphate aminotransferase [isomerizing] 1	9	1.07621	0.0171545	88	107	6	6	1.25494e+06	1.89809e+06	19	no	Undetermined	yes
2677	P38435	GGCX	Vitamin K-dependent gamma-carboxylase	1	8.74202	9.29254e-06	0	32	1	6	173054	3.34598e+07	32	no	ER	yes
27089	O14949	UQCRQ	Cytochrome b-c1 complex subunit 8	3	1.63138	3.01939e-05	85	161	6	6	2.66457e+06	5.21056e+06	76	no	Mitochondria	yes
27161	Q9UKV8	AGO2	Protein argonaute-2	22	1.33753	5.0058e-06	1	13	5	5	383350	956120	12	no	Undefined	yes
27183	Q9UN37	VPS4A	Vacuolar protein sorting-associated protein 4A	5	1.25337	0.00965083	4	20	6	5	1.17777e+06	2.58552e+06	16	no	Trafficking	yes
27238	Q92917	GPKOW	G patch domain and KOW motifs-containing protein	10	1.31532	7.14583e-06	31	48	6	6	842805	2.85205e+06	17	no	Nuclear	yes
2745	P35754	GLRX	Glutaredoxin-1	1	1.21972	0.00100267	3	25	6	6	386598	1.42935e+06	22	yes	Plasma Membrane	yes
2794	P36915	GNL1	Guanine nucleotide-binding protein-like 1	2	1.58543	0.0027624	21	41	6	6	830808	1.50024e+06	20	no	Vesicles	yes
285282	Q5HYI8	RABL3	Rab-like protein 3	3	1.10768	1.83389e-11	31	57	6	6	2.1172e+06	4.35235e+06	26	no	Nuclear	yes
2887	Q13322	GRB10	Growth factor receptor-bound protein 10	1	2.7233	0.000302338	7	24	6	6	656799	1.40512e+06	17	no	Vesicles	yes
29085	Q9NRX4	PHPT1	14 kDa phosphohistidine phosphatase	0	1.61569	2.05741e-05	125	256	6	6	7.57029e+06	1.63879e+07	131	no	Undetermined	yes
29087	Q9P016	THYN1	Thymocyte nuclear protein 1	0	1.157	0.00348	19	57	6	6	1.76087e+06	4.25993e+06	38	no	Nuclear	yes
291	P12235	SLC25A4	ADP/ATP translocase 1	136	1.65663	1.26616e-08	198	271	6	6	1.37804e+07	4.08293e+07	73	no	Mitochondria	yes
2969	P78347	GTF2I	General transcription factor II-I	75	1.20838	2.77016e-06	50	157	6	6	1.37724e+06	3.11435e+06	107	no	Undetermined	yes
29926	Q96IJ6	GMPPA	Mannose-1-phosphate guanyltransferase alpha	3	1.85871	3.18298e-10	147	255	6	6	4.24297e+06	8.19993e+06	108	no	Undetermined	yes
29957	Q6NUK1	SLC25A24	Calcium-binding mitochondrial carrier protein SCaMC-1	4	1.18332	1.07919e-06	391	579	6	6	5.02303e+06	9.18829e+06	188	no	Mitochondria	yes
29974	Q9NQ94	A1CF	APOBEC1 complementation factor	0	1.4355	4.15872e-06	93	175	6	6	2.36409e+06	5.80162e+06	82	no	Nuclear	yes
3032	P55084	HADHB	Trifunctional enzyme subunit beta, mitochondrial;3-ketoacyl-CoA thiolase	23	1.03384	6.40358e-08	618	815	6	6	1.01317e+07	1.79071e+07	197	no	Mitochondria	yes
3035	P12081	HARS	Histidine--tRNA ligase, cytoplasmic	18	2.03074	0.00489693	0	27	3	6	113549	1.5023e+06	27	no	Undefined	yes
3094	P49773	HINT1	Histidine triad nucleotide-binding protein 1	13	2.1549	3.30622e-07	197	438	6	6	1.02991e+07	2.13671e+07	241	no	Metabolism	yes
3146	P09429	HMGB1	High mobility group protein B1	65	1.67457	0.0037706	11	29	6	6	1.73799e+06	3.22088e+06	18	no	Nuclear	yes
3155	P35914	HMGCL	Hydroxymethylglutaryl-CoA lyase, mitochondrial	1	1.69042	2.90891e-05	68	108	6	6	3.36491e+06	8.87817e+06	40	no	Secreted	yes
3170	Q9Y261	FOXA2	Hepatocyte nuclear factor 3-beta	0	1.51866	0.00266699	2	13	5	5	646095	2.24931e+06	11	no	Stress response	yes
318	P50583	NUDT2	Bis(5-nucleosyl)-tetraphosphatase [asymmetrical]	0	1.32509	0.000277461	1	13	6	5	1.42792e+06	5.0111e+06	12	no	Undetermined	yes
3183	P07910	HNRNPC	Heterogeneous nuclear ribonucleoproteins C1/C2	127	1.56435	0.00964872	8	41	5	6	2.85271e+06	6.49032e+06	33	no	Nuclear	yes
3184	Q14103	HNRNPD	Heterogeneous nuclear ribonucleoprotein D0	153	1.17675	5.56524e-05	99	209	6	6	4.26923e+06	8.66286e+06	110	no	Undetermined	yes
3191	P14866	HNRNPL	Heterogeneous nuclear ribonucleoprotein L	133	1.07698	0.00114827	143	252	6	6	7.67703e+06	1.3987e+07	109	no	Protein synthesis	yes
3192	Q00839	HNRNPU	Heterogeneous nuclear ribonucleoprotein U	212	1.15526	0.000270173	358	635	6	6	6.29778e+06	1.58383e+07	277	no	Nuclear	yes
3309	P11021	HSPA5	78 kDa glucose-regulated protein	292	2.5934	0	633	1818	6	6	4.64873e+06	1.68414e+07	1185	no	Folding	yes
3312	P11142	HSPA8	Heat shock cognate 71 kDa protein	328	1.57064	3.59774e-08	319	563	6	6	3.50236e+06	7.96297e+06	244	no	Folding	yes
3313	P38646	HSPA9	Stress-70 protein, mitochondrial	239	1.45704	8.70859e-12	591	1057	6	6	8.8357e+06	1.86367e+07	466	no	Folding	yes
3418	P48735	IDH2	Isocitrate dehydrogenase [NADP], mitochondrial	11	1.14574	7.99882e-06	450	682	6	6	1.04576e+07	2.12379e+07	232	no	Mitochondria	yes
3420	O43837	IDH3B	Isocitrate dehydrogenase [NAD] subunit beta, mitochondrial	7	1.03577	0.000882203	111	215	6	6	2.15944e+06	4.65101e+06	104	no	Mitochondria	yes
349565	Q96T66	NMNAT3	Nicotinamide/nicotinic acid mononucleotide adenylyltransferase 3	0	1.00216	9.18302e-05	51	69	6	6	1.15124e+06	2.54483e+06	18	no	Undetermined	yes
3630	P01308	INS	Insulin;Insulin B chain;Insulin A chain	0	7.03389	3.86358e-14	100	1974	6	6	1.12152e+07	1.6319e+08	1874	no	Secreted	yes
3631	Q96PE3	INPP4A	Type I inositol 3,4-bisphosphate 4-phosphatase	1	1.30002	0.00132839	0	12	6	6	939726	8.52602e+06	12	no	Undetermined	yes
374291	O75251	NDUFS7	NADH dehydrogenase [ubiquinone] iron-sulfur protein 7, mitochondrial	6	2.22519	0.00143953	23	36	6	6	2.72776e+06	5.72535e+06	13	no	Undefined	yes
376497	Q6PCB7	SLC27A1	Long-chain fatty acid transport protein 1	0	1.15625	3.33149e-06	34	65	6	6	422412	892976	31	no	Plasma Membrane	yes
3796	O00139	KIF2A	Kinesin-like protein KIF2A	18	1.09824	0.00228825	7	19	6	6	1.06621e+06	1.95218e+06	12	no	Secreted	yes
3858	P13645	KRT10	Keratin, type I cytoskeletal 10	297	1.19034	0.000544514	432	699	6	6	1.5428e+07	5.05795e+07	267	no	Undetermined	yes
3875	P05783	KRT18	Keratin, type I cytoskeletal 18	182	1.47136	0.0167226	184	322	6	6	1.33889e+07	2.71864e+07	138	no	Trafficking	yes
3898	O00515	LAD1	Ladinin-1	0	1.39111	1.25855e-07	59	91	6	6	1.975e+06	3.66671e+06	32	no	Cytoskeleton	yes
391	P84095	RHOG	Rho-related GTP-binding protein RhoG	7	1.37873	0.000116994	21	51	6	6	3.8584e+06	5.58074e+06	30	no	Undetermined	yes
3921	P08865	RPSA	40S ribosomal protein SA	103	1.00003	3.97473e-05	84	139	6	6	4.45695e+06	7.19246e+06	55	no	Protein synthesis	yes
3959	Q08380	LGALS3BP	Galectin-3-binding protein	16	1.10911	0.0020248	21	59	6	6	2.51374e+06	6.44996e+06	38	no	Nuclear	yes
3980	P49916	LIG3	DNA ligase 3	12	1.53653	0.00152542	12	27	6	6	991433	1.91398e+06	15	no	Undefined	yes
3993	Q6P1M3	LLGL2	Lethal(2) giant larvae protein homolog 2	0	1.01301	3.67593e-07	24	65	6	6	518159	1.03129e+06	41	no	Undetermined	yes
399687	Q92614	MYO18A	Unconventional myosin-XVIIIa	11	3.71011	5.86553e-06	3	118	5	6	492123	3.95226e+06	115	no	Trafficking	yes
400	P40616	ARL1	ADP-ribosylation factor-like protein 1	14	1.37478	1.08484e-05	134	156	6	6	5.19802e+06	1.52964e+07	22	no	Trafficking	yes
4008	Q8WWI1	LMO7	LIM domain only protein 7	17	1.6255	0.000932065	0	11	5	6	2.12058e+06	2.34698e+06	11	no	Cytoskeleton	yes
4082	P29966	MARCKS	Myristoylated alanine-rich C-kinase substrate	47	2.14652	2.90028e-05	19	52	4	5	2.55901e+06	5.21107e+06	33	no	Cytoskeleton	yes
4128	P21397	MAOA	Amine oxidase [flavin-containing] A	0	1.43267	6.99983e-09	282	565	6	6	3.48183e+06	6.42019e+06	283	no	Mitochondria	yes
4133	P11137	MAP2	Microtubule-associated protein 2	1	1.00128	0.000264378	78	236	6	6	2.14319e+06	5.28902e+06	158	no	Undetermined	yes
4144	P31153	MAT2A	S-adenosylmethionine synthase isoform type-2	34	1.08916	0.00294839	12	23	5	6	1.15102e+06	2.29412e+06	11	no	Nuclear	yes
421	O00192	ARVCF	Armadillo repeat protein deleted in velo-cardio-facial syndrome	3	1.10495	0.00113206	12	41	6	6	766320	1.43468e+06	29	no	Undetermined	yes
4247	Q10469	MGAT2	Alpha-1,6-mannosyl-glycoprotein 2-beta-N-acetylglucosaminyltransferase	0	1.34554	9.64957e-06	21	61	6	6	674744	1.65436e+06	40	no	Golgi	yes
4282	P14174	MIF	Macrophage migration inhibitory factor	27	1.17063	0.000451211	126	193	6	6	9.45654e+06	1.6972e+07	67	no	Plasma Membrane	yes
4329	Q02252	ALDH6A1	Methylmalonate-semialdehyde dehydrogenase [acylating], mitochondrial	1	1.01355	0.000514973	25	44	6	5	2.41399e+06	3.9399e+06	19	no	Mitochondria	yes
4430	O43795	MYO1B	Unconventional myosin-Ib	47	1.29175	4.34664e-08	186	368	6	6	3.18353e+06	6.64272e+06	182	yes	Cytoskeleton	yes
4615	Q99836	MYD88	Myeloid differentiation primary response protein MyD88	0	1.3748	1.69824e-09	49	94	6	6	583678	1.40003e+06	45	no	Undetermined	yes
4637	P60660	MYL6	Myosin light polypeptide 6	126	1.83902	1.48852e-07	117	217	6	6	1.78527e+07	3.34327e+07	100	no	Cytoskeleton	yes
4641	O00159	MYO1C	Unconventional myosin-Ic	60	1.146	1.56141e-07	99	203	6	6	2.65566e+06	5.26933e+06	104	no	Plasma Membrane	yes
4642	O94832	MYO1D	Unconventional myosin-Id	33	1.00423	3.08731e-10	244	428	6	6	2.09899e+06	5.25662e+06	184	no	Cytoskeleton	yes
4646	Q9UM54	MYO6	Unconventional myosin-VI	29	1.1538	1.4121e-07	383	710	6	6	3.40366e+06	7.91796e+06	327	no	Trafficking	yes
4695	O43678	NDUFA2	NADH dehydrogenase [ubiquinone] 1 alpha subcomplex subunit 2	0	1.21028	0.000707138	48	79	6	6	2.41834e+06	3.84452e+06	31	no	Mitochondria	yes
4697	O00483	NDUFA4	Cytochrome c oxidase subunit NDUFA4	5	1.71081	0.00460391	27	76	6	6	1.30972e+07	2.46413e+07	49	no	Mitochondria	yes
4698	Q16718	NDUFA5	NADH dehydrogenase [ubiquinone] 1 alpha subcomplex subunit 5	3	1.31299	3.77945e-06	77	162	6	6	1.12822e+07	2.08522e+07	85	no	Mitochondria	yes
4700	P56556	NDUFA6	NADH dehydrogenase [ubiquinone] 1 alpha subcomplex subunit 6	3	1.16502	5.31063e-05	48	69	6	6	1.47821e+06	3.06301e+06	21	no	Stress response	yes
4701	O95182	NDUFA7	NADH dehydrogenase [ubiquinone] 1 alpha subcomplex subunit 7	0	1.56918	0.000200479	33	50	6	6	3.54544e+06	8.71294e+06	17	no	Mitochondria	yes
4702	P51970	NDUFA8	NADH dehydrogenase [ubiquinone] 1 alpha subcomplex subunit 8	0	1.32682	0.00151776	23	53	6	6	2.55312e+06	5.15063e+06	30	no	Mitochondria	yes
4704	Q16795	NDUFA9	NADH dehydrogenase [ubiquinone] 1 alpha subcomplex subunit 9, mitochondrial	15	1.17725	1.06772e-08	250	371	6	6	2.96789e+06	6.82713e+06	121	no	Mitochondria	yes
4710	O95168	NDUFB4	NADH dehydrogenase [ubiquinone] 1 beta subcomplex subunit 4	4	1.44419	6.96745e-11	63	85	6	6	2.61262e+06	7.91695e+06	22	no	Stress response	yes
4719	P28331	NDUFS1	NADH-ubiquinone oxidoreductase 75 kDa subunit, mitochondrial	12	1.13739	0.000300396	262	378	6	6	2.6204e+06	6.15081e+06	116	no	Mitochondria	yes
4723	P49821	NDUFV1	NADH dehydrogenase [ubiquinone] flavoprotein 1, mitochondrial	3	1.71013	5.63152e-07	141	245	6	6	4.5632e+06	1.07869e+07	104	no	Mitochondria	yes
4724	O43181	NDUFS4	NADH dehydrogenase [ubiquinone] iron-sulfur protein 4, mitochondrial	0	1.62133	1.78425e-08	23	55	6	6	4.44494e+06	7.62063e+06	32	no	Mitochondria	yes
4725	O43920	NDUFS5	NADH dehydrogenase [ubiquinone] iron-sulfur protein 5	1	1.31088	1.47127e-05	69	82	6	6	2.92069e+06	6.68955e+06	13	no	Mitochondria	yes
4726	O75380	NDUFS6	NADH dehydrogenase [ubiquinone] iron-sulfur protein 6, mitochondrial	0	1.32176	3.44772e-07	30	69	6	6	3.51517e+06	6.009e+06	39	no	Mitochondria	yes
4729	P19404	NDUFV2	NADH dehydrogenase [ubiquinone] flavoprotein 2, mitochondrial	2	1.00686	1.33093e-05	49	113	6	6	2.80317e+06	6.4794e+06	64	yes	Mitochondria	yes
4750	Q96PY6	NEK1	Serine/threonine-protein kinase Nek1	0	1.36441	0.000791294	16	38	6	6	279933	1.26687e+06	22	no	Nuclear	yes
476	P05023	ATP1A1	Sodium/potassium-transporting ATPase subunit alpha-1	67	1.38966	8.08426e-06	16	40	6	6	1.55991e+06	2.30683e+06	24	no	Plasma Membrane	yes
4825	P78426	NKX6-1	Homeobox protein Nkx-6.1	0	1.20107	0.0207957	3	23	3	5	1.14174e+06	3.15145e+06	20	no	Nuclear	yes
4841	Q15233	NONO	Non-POU domain-containing octamer-binding protein	152	1.07472	9.46958e-05	152	241	6	6	8.23761e+06	1.74741e+07	89	no	Nuclear	yes
4904	P67809	YBX1	Nuclease-sensitive element-binding protein 1	184	1.30564	0.0039959	2	24	3	5	1.42457e+06	3.83536e+06	22	no	Protein synthesis	yes
50485	Q9NZC9	SMARCAL1	SWI/SNF-related matrix-associated actin-dependent regulator of chromatin subfamily A-like protein 1	2	1.25954	0.00218259	4	18	6	6	168752	538916	14	no	Nuclear	yes
50488	Q8N4C8	MINK1	Misshapen-like kinase 1	4	1.28001	1.8898e-05	18	50	6	6	954597	1.93296e+06	32	no	Undetermined	yes
50506	Q9NRD8	DUOX2	Dual oxidase 2	0	1.699	6.32645e-07	1	12	5	5	1.94687e+06	4.02375e+06	11	yes	Undetermined	yes
5052	Q06830	PRDX1	Peroxiredoxin-1	186	1.07034	3.44329e-05	212	381	6	6	4.63999e+06	9.1016e+06	169	yes	Mitochondria	yes
50814	Q15738	NSDHL	Sterol-4-alpha-carboxylate 3-dehydrogenase, decarboxylating	6	1.13322	0.000790351	32	52	6	6	2.66029e+06	5.59662e+06	20	no	ER	yes
509	P36542	ATP5C1	ATP synthase subunit gamma, mitochondrial	33	1.34695	1.21796e-08	560	928	6	6	1.34819e+07	2.83971e+07	368	no	Mitochondria	yes
51035	Q04323	UBXN1	UBX domain-containing protein 1	3	1.31156	4.21489e-05	19	30	6	5	1.36091e+06	2.68115e+06	11	no	Degradation	yes
51065	Q71UM5	RPS27L	40S ribosomal protein S27-like	116	1.16179	0.00516106	18	45	6	6	4.69833e+06	6.79747e+06	27	no	Protein synthesis	yes
51070	Q9Y314	NOSIP	Nitric oxide synthase-interacting protein	3	1.32233	0.00014247	12	35	6	6	2.49969e+06	4.41222e+06	23	no	Undetermined	yes
51097	Q8NBX0	SCCPDH	Saccharopine dehydrogenase-like oxidoreductase	2	1.69361	4.93314e-07	142	284	6	6	5.50538e+06	1.13865e+07	142	no	Vesicles	yes
51119	Q9Y3A5	SBDS	Ribosome maturation protein SBDS	9	1.08145	0.00160863	62	88	6	6	3.75664e+06	7.2962e+06	26	no	Nuclear	yes
51144	Q53GQ0	HSD17B12	Very-long-chain 3-oxoacyl-CoA reductase	8	1.27017	1.14106e-08	244	346	6	6	1.67667e+07	4.13446e+07	102	no	ER	yes
51164	Q9UJW0	DCTN4	Dynactin subunit 4	8	1.32214	0.000129025	32	60	6	6	630317	2.43648e+06	28	no	Cytoskeleton	yes
51204	Q9BSH4	TACO1	Translational activator of cytochrome c oxidase 1	1	1.53855	0.000672105	42	71	6	6	2.35756e+06	4.95209e+06	29	no	Mitochondria	yes
5122	P29120	PCSK1	Neuroendocrine convertase 1	1	1.47455	4.64025e-05	41	58	6	6	1.97152e+06	3.67241e+06	17	yes	Secreted	yes
51295	Q9BQ95	ECSIT	Evolutionarily conserved signaling intermediate in Toll pathway, mitochondrial	0	1.01167	0.000692091	25	61	5	5	1.27339e+06	2.10131e+06	36	no	Mitochondria	yes
51382	Q9Y5K8	ATP6V1D	V-type proton ATPase subunit D	0	1.49925	0.000512611	12	28	5	6	1.39931e+06	2.76236e+06	16	no	Nuclear	yes
51474	Q9UHB6	LIMA1	LIM domain and actin-binding protein 1	45	1.79684	6.33253e-11	79	172	6	6	1.01522e+06	2.96509e+06	93	no	Cytoskeleton	yes
51510	Q9NZZ3	CHMP5	Charged multivesicular body protein 5	2	2.01955	0.000334283	3	16	6	6	1.791e+06	5.12157e+06	13	no	Trafficking	yes
51534	Q9NP79	VTA1	Vacuolar protein sorting-associated protein VTA1 homolog	3	1.2573	0.00020131	51	73	6	6	2.17225e+06	4.80693e+06	22	no	Trafficking	yes
5160	P08559	PDHA1	Pyruvate dehydrogenase E1 component subunit alpha, somatic form, mitochondrial	25	1.37905	3.08494e-06	129	256	6	6	3.03691e+06	9.20442e+06	127	no	Mitochondria	yes
5165	Q15120	PDK3	[Pyruvate dehydrogenase (acetyl-transferring)] kinase isozyme 3, mitochondrial	2	1.14714	5.0317e-08	122	229	6	6	3.12654e+06	5.61556e+06	107	no	Mitochondria	yes
51651	Q9Y3E5	PTRH2	Peptidyl-tRNA hydrolase 2, mitochondrial	7	1.76216	4.31179e-06	16	42	6	6	2.87128e+06	5.25066e+06	26	no	Mitochondria	yes
51678	Q9NZW5	MPP6	MAGUK p55 subfamily member 6	3	1.05634	0.00714043	10	33	5	5	487654	1.42938e+06	23	no	Plasma Membrane	yes
51699	Q9UBQ0	VPS29	Vacuolar protein sorting-associated protein 29	7	1.0224	4.82897e-05	58	70	6	6	1.32002e+06	2.60092e+06	12	no	Vesicles	yes
51726	Q9UBS4	DNAJB11	DnaJ homolog subfamily B member 11	27	1.90978	1.16282e-06	135	297	6	6	2.87984e+06	6.26909e+06	162	no	Folding	yes
51741	Q9NZC7	WWOX	WW domain-containing oxidoreductase	0	1.75953	0.00202199	3	19	3	5	128118	328889	16	no	Trafficking	yes
5188	O75879	GATB	Glutamyl-tRNA(Gln) amidotransferase subunit B, mitochondrial	0	1.27938	2.23539e-05	1	16	5	5	1.41685e+06	2.03319e+06	15	no	Mitochondria	yes
5213	P08237	PFKM	ATP-dependent 6-phosphofructokinase, muscle type	17	1.07444	6.00428e-05	656	999	6	6	4.60005e+06	9.18134e+06	343	no	ER	yes
5250	Q00325	SLC25A3	Phosphate carrier protein, mitochondrial	79	1.20233	1.83529e-05	247	386	6	6	1.01524e+07	1.77488e+07	139	no	Mitochondria	yes
5300	Q13526	PIN1	Peptidyl-prolyl cis-trans isomerase NIMA-interacting 1	11	2.51718	0.000155847	14	61	5	6	1.00783e+06	3.85501e+06	47	no	Undefined	yes
5315	P14618	PKM	Pyruvate kinase PKM	181	1.03622	5.48169e-09	2961	4543	6	6	5.77687e+07	9.95819e+07	1582	no	Metabolism	yes
539	P48047	ATP5O	ATP synthase subunit O, mitochondrial	29	1.2269	1.5314e-09	535	817	6	6	2.38739e+07	5.12523e+07	282	no	Mitochondria	yes
5431	P30876	POLR2B	DNA-directed RNA polymerase II subunit RPB2	36	1.32464	1.93346e-06	13	66	6	6	568078	1.48918e+06	53	no	Nuclear	yes
54332	Q8TB36	GDAP1	Ganglioside-induced differentiation-associated protein 1	1	1.483	8.64627e-08	194	366	6	6	6.474e+06	1.40468e+07	172	no	Mitochondria	yes
54431	Q8IXB1	DNAJC10	DnaJ homolog subfamily C member 10	14	1.37381	5.463e-08	31	79	6	6	1.31043e+06	3.28051e+06	48	no	Folding	yes
54502	A0AV96	RBM47	RNA-binding protein 47	1	1.54676	4.1399e-06	146	244	6	6	2.53697e+06	7.75297e+06	98	yes	Undetermined	yes
5478	P62937	PPIA	Peptidyl-prolyl cis-trans isomerase A;Peptidyl-prolyl cis-trans isomerase A, N-terminally processed	131	1.47534	4.88201e-06	172	320	6	6	1.03287e+07	2.40294e+07	148	no	Folding	yes
54788	Q9NXW2	DNAJB12	DnaJ homolog subfamily B member 12	3	1.19226	0.00537523	14	33	6	5	703803	1.55347e+06	19	no	Folding	yes
54882	Q8IWZ3	ANKHD1	Ankyrin repeat and KH domain-containing protein 1	8	1.10301	0.029632	19	36	6	6	388404	621569	17	no	Undetermined	yes
54888	Q08J23	NSUN2	tRNA (cytosine(34)-C(5))-methyltransferase	35	1.39868	8.15905e-10	152	319	6	6	3.00881e+06	6.89349e+06	167	no	Nuclear	yes
54890	Q6P6C2	ALKBH5	RNA demethylase ALKBH5	4	2.56595	0.00842527	0	13	2	3	421842	1.94788e+06	13	no	Undetermined	yes
54948	Q9NX20	MRPL16	39S ribosomal protein L16, mitochondrial	2	1.43579	0.00267796	7	19	6	6	581241	2.27698e+06	12	no	Mitochondria	yes
5500	P62140	PPP1CB	Serine/threonine-protein phosphatase PP1-beta catalytic subunit	72	1.12303	0.00132246	12	33	6	6	1.0205e+06	2.1081e+06	21	no	Nuclear	yes
5511	Q12972	PPP1R8	Nuclear inhibitor of protein phosphatase 1;Activator of RNA decay	3	1.8779	5.29275e-05	18	47	6	6	1.9276e+06	3.52557e+06	29	no	Undetermined	yes
55149	Q9NVV4	MTPAP	Poly(A) RNA polymerase, mitochondrial	6	1.30039	0.019836	10	32	6	6	5.70668e+06	7.21288e+06	22	no	Mitochondria	yes
55160	Q9HCE6	ARHGEF10L	Rho guanine nucleotide exchange factor 10-like protein	2	1.66072	0.00644192	0	13	4	5	420964	1.43816e+06	13	yes	Golgi	yes
55161	P57088	TMEM33	Transmembrane protein 33	16	1.15797	3.3862e-08	65	100	6	6	1.79264e+06	3.55385e+06	35	no	ER	yes
5518	P30153	PPP2R1A	Serine/threonine-protein phosphatase 2A 65 kDa regulatory subunit A alpha isoform	84	1.34985	0.000158822	11	25	6	6	3.03082e+06	4.72487e+06	14	no	Undetermined	yes
55269	Q8WXF1	PSPC1	Paraspeckle component 1	42	2.10695	1.68786e-07	15	51	6	6	1.04006e+06	3.49531e+06	36	no	Nuclear	yes
552900	Q9H3K6	BOLA2	BolA-like protein 2	36	2.02279	6.17103e-05	30	60	6	6	1.75779e+06	3.97992e+06	30	no	Nuclear	yes
55602	Q9NXV6	CDKN2AIP	CDKN2A-interacting protein	6	1.60067	2.70746e-06	14	26	6	6	653230	1.6989e+06	12	no	Folding	yes
5562	Q13131	PRKAA1	5-AMP-activated protein kinase catalytic subunit alpha-1	0	1.433	5.1051e-05	23	45	6	6	406235	1.36653e+06	22	no	Degradation	yes
55621	Q9NXH9	TRMT1	tRNA (guanine(26)-N(2))-dimethyltransferase	11	1.06946	5.17945e-06	4	20	5	6	3.19014e+06	6.18426e+06	16	no	Plasma Membrane	yes
55644	Q9NPF4	OSGEP	Probable tRNA N6-adenosine threonylcarbamoyltransferase	4	1.65146	2.43148e-07	57	134	6	6	1.22864e+06	3.79309e+06	77	no	Nuclear	yes
55651	P55769	NHP2L1	NHP2-like protein 1;NHP2-like protein 1, N-terminally processed	36	1.20006	3.74588e-05	37	78	6	6	1.02222e+06	1.71514e+06	41	no	#N/A	yes
55699	Q9NSE4	IARS2	Isoleucine--tRNA ligase, mitochondrial	6	1.78004	1.40995e-09	202	495	6	6	2.52371e+06	6.43622e+06	293	no	Mitochondria	yes
55720	Q2NL82	TSR1	Pre-rRNA-processing protein TSR1 homolog	24	2.01299	0.0250455	2	12	3	3	266325	769958	10	no	Nuclear	yes
55735	Q9NVH1	DNAJC11	DnaJ homolog subfamily C member 11	5	1.69724	1.58521e-05	31	72	6	6	2.28425e+06	5.54452e+06	41	no	Folding	yes
55750	Q53H12	AGK	Acylglycerol kinase, mitochondrial	13	1.31988	9.2625e-07	55	104	6	6	2.89476e+06	4.22431e+06	49	no	Mitochondria	yes
55754	Q9NV96	TMEM30A	Cell cycle control protein 50A	2	1.60687	2.75593e-05	33	54	6	6	1.09782e+06	4.55586e+06	21	no	Mitochondria	yes
55854	Q8WU90	ZC3H15	Zinc finger CCCH domain-containing protein 15	13	1.7264	0.00198223	6	17	2	2	708277	2.23683e+06	11	no	Undetermined	yes
5594	P28482	MAPK1	Mitogen-activated protein kinase 1	10	1.19087	0.000110541	79	159	6	6	2.40192e+06	4.73632e+06	80	no	Stress response	yes
55967	Q9UI09	NDUFA12	NADH dehydrogenase [ubiquinone] 1 alpha subcomplex subunit 12	0	1.02401	0.000328006	81	207	6	6	1.50985e+06	3.96922e+06	126	no	Stress response	yes
5609	O14733	MAP2K7	Dual specificity mitogen-activated protein kinase kinase 7	0	1.6881	4.11273e-07	2	12	5	6	506869	2.03159e+06	10	no	Plasma Membrane	yes
5610	P19525	EIF2AK2	Interferon-induced, double-stranded RNA-activated protein kinase	11	1.03185	0.00010408	27	59	6	6	2.24852e+06	4.81221e+06	32	no	Stress response	yes
5611	Q13217	DNAJC3	DnaJ homolog subfamily C member 3	0	1.59632	5.33127e-05	46	121	6	6	3.04298e+06	6.71476e+06	75	no	Folding	yes
56902	Q9NRX1	PNO1	RNA-binding protein PNO1	9	1.86701	9.04039e-06	3	23	6	6	645673	1.54832e+06	20	no	Nuclear	yes
57003	Q96A33	CCDC47	Coiled-coil domain-containing protein 47	11	1.05864	0.0028769	126	185	6	6	1.68657e+06	3.17621e+06	59	no	ER	yes
5710	P55036	PSMD4	26S proteasome non-ATPase regulatory subunit 4	30	1.46637	6.61453e-06	86	176	6	6	5.57945e+06	8.70275e+06	90	no	Degradation	yes
57128	Q9HD34	LYRM4	LYR motif-containing protein 4	1	1.21957	0.00656918	5	16	6	6	814802	2.57224e+06	11	no	Nuclear	yes
57410	Q96KG9	SCYL1	N-terminal kinase-like protein	2	1.09924	4.88847e-08	153	213	6	6	1.81562e+06	4.13926e+06	60	no	Trafficking	yes
57414	Q6NTF9	RHBDD2	Rhomboid domain-containing protein 2	0	1.29009	4.15379e-05	0	10	5	6	2.83655e+06	1.19896e+07	10	no	Secreted	yes
57470	Q8N1G4	LRRC47	Leucine-rich repeat-containing protein 47	22	1.17078	0.000178106	59	139	6	6	1.81517e+06	3.89187e+06	80	no	Undetermined	yes
57532	Q7Z417	NUFIP2	Nuclear fragile X mental retardation-interacting protein 2	54	1.23159	0.00345523	10	20	6	6	569913	1.27929e+06	10	no	Protein synthesis	yes
57535	Q6UXG2	KIAA1324	UPF0577 protein KIAA1324	1	1.14596	0.0135975	1	21	4	6	647724	880653	20	no	Undetermined	yes
57665	Q9HBH5	RDH14	Retinol dehydrogenase 14	0	1.44541	6.2357e-07	125	237	6	6	2.70961e+06	3.79137e+06	112	no	ER	yes
57680	Q9HCK8	CHD8	Chromodomain-helicase-DNA-binding protein 8	6	1.44017	7.26377e-05	11	35	6	6	429120	961826	24	no	Nuclear	yes
5825	P28288	ABCD3	ATP-binding cassette sub-family D member 3	18	1.19463	1.45676e-05	43	75	6	6	2.09502e+06	3.76382e+06	32	no	Vesicles	yes
58472	Q9Y6N5	SQRDL	Sulfide:quinone oxidoreductase, mitochondrial	1	1.29923	1.64855e-11	456	648	6	6	5.87686e+06	1.24558e+07	192	yes	Mitochondria	yes
58517	P49756	RBM25	RNA-binding protein 25	38	2.0172	0.000773234	1	33	5	6	754407	2.59218e+06	32	no	Nuclear	yes
5868	P20339	RAB5A	Ras-related protein Rab-5A	22	1.60978	0.000216966	45	71	6	6	2.61896e+06	5.54081e+06	26	no	Trafficking	yes
5872	P51153	RAB13	Ras-related protein Rab-13	12	1.72721	0.000788316	39	68	6	6	3.28697e+06	5.11555e+06	29	no	Plasma Membrane	yes
5901	P62826	RAN	GTP-binding nuclear protein Ran	90	1.05625	4.8498e-06	327	490	6	6	9.85878e+06	1.62238e+07	163	no	Nuclear	yes
59338	Q9HB21	PLEKHA1	Pleckstrin homology domain-containing family A member 1	0	1.51083	7.24442e-06	5	37	6	6	1.02455e+06	1.90091e+06	32	no	Undetermined	yes
5976	Q92900	UPF1	Regulator of nonsense transcripts 1	28	1.25393	3.02442e-07	88	189	6	6	1.09338e+06	2.32362e+06	101	no	Undetermined	yes
60678	P57772	EEFSEC	Selenocysteine-specific elongation factor	4	1.21397	3.54422e-07	28	86	6	6	1.19621e+06	2.88094e+06	58	no	Nuclear	yes
6122	P39023	RPL3	60S ribosomal protein L3	113	1.25915	0.00151891	73	112	6	6	2.36018e+06	5.06082e+06	39	no	Protein synthesis	yes
6124	P36578	RPL4	60S ribosomal protein L4	148	1.16655	0.00626156	26	92	6	6	1.86737e+06	3.68626e+06	66	no	Protein synthesis	yes
6125	P46777	RPL5	60S ribosomal protein L5	108	1.27334	1.05317e-08	148	164	6	6	5.52143e+06	8.87366e+06	16	no	Protein synthesis	yes
6128	Q02878	RPL6	60S ribosomal protein L6	124	1.03951	0.0114849	16	51	6	6	1.25061e+06	2.5881e+06	35	no	Protein synthesis	yes
6129	P18124	RPL7	60S ribosomal protein L7	133	1.16895	0.000275949	22	32	6	6	2.74833e+06	6.33835e+06	10	no	ER	yes
6130	P62424	RPL7A	60S ribosomal protein L7a	147	1.22877	0.000105474	34	102	6	6	2.37989e+06	4.61314e+06	68	no	Protein synthesis	yes
6132	P62917	RPL8	60S ribosomal protein L8	121	1.11413	0.000974304	246	376	6	6	7.39979e+06	1.45381e+07	130	no	Protein synthesis	yes
6133	P32969	RPL9	60S ribosomal protein L9	114	1.25151	3.54939e-08	374	797	6	6	1.93791e+07	4.07788e+07	423	no	Protein synthesis	yes
6135	P62913	RPL11	60S ribosomal protein L11	148	1.6128	2.07667e-07	282	440	6	6	2.02822e+07	4.06224e+07	158	no	Protein synthesis	yes
6136	P30050	RPL12	60S ribosomal protein L12	140	1.95483	1.30383e-06	22	57	6	6	3.42288e+06	7.43209e+06	35	no	Golgi	yes
6138	P61313	RPL15	60S ribosomal protein L15	105	1.30573	7.05103e-05	28	63	6	6	2.33613e+06	4.8264e+06	35	no	Protein synthesis	yes
6139	P18621	RPL17	60S ribosomal protein L17	133	1.42878	3.648e-05	254	430	6	6	6.51521e+06	1.57802e+07	176	no	Protein synthesis	yes
6142	Q02543	RPL18A	60S ribosomal protein L18a	75	1.28613	0.00364731	30	60	5	6	912606	1.96736e+06	30	no	Protein synthesis	yes
6146	P35268	RPL22	60S ribosomal protein L22	133	1.57804	1.71798e-07	166	179	6	6	5.12471e+07	1.16146e+08	13	no	Protein synthesis	yes
6147	P62750	RPL23A	60S ribosomal protein L23a	176	1.40313	2.08679e-09	320	473	6	6	1.13186e+07	2.96535e+07	153	no	Protein synthesis	yes
6152	P83731	RPL24	60S ribosomal protein L24	135	1.23688	4.68055e-07	251	311	6	6	9.91969e+06	2.16564e+07	60	no	Protein synthesis	yes
6155	P61353	RPL27	60S ribosomal protein L27	121	1.47031	0.00084643	71	115	6	6	3.85704e+06	1.05756e+07	44	no	Protein synthesis	yes
6156	P62888	RPL30	60S ribosomal protein L30	80	1.68981	6.38241e-06	116	143	6	6	6.88707e+06	1.01497e+07	27	no	Protein synthesis	yes
6157	P46776	RPL27A	60S ribosomal protein L27a	142	1.34754	9.99901e-07	117	153	6	6	7.90768e+06	1.99122e+07	36	no	Protein synthesis	yes
6158	P46779	RPL28	60S ribosomal protein L28	69	1.75393	3.99002e-05	102	166	6	6	4.39895e+06	9.32699e+06	64	no	Protein synthesis	yes
6159	P47914	RPL29	60S ribosomal protein L29	117	1.43241	0.0183035	70	109	6	6	2.12494e+07	4.83637e+07	39	no	Protein synthesis	yes
6160	P62899	RPL31	60S ribosomal protein L31	125	1.32913	0.000633813	86	137	6	6	3.5876e+07	7.16963e+07	51	no	Protein synthesis	yes
6161	P62910	RPL32	60S ribosomal protein L32	52	1.71338	1.61294e-05	116	270	6	6	3.67221e+06	7.97506e+06	154	no	Protein synthesis	yes
6168	P61513	RPL37A	60S ribosomal protein L37a	73	1.80567	7.23787e-05	124	179	6	6	9.96892e+06	1.9272e+07	55	no	Protein synthesis	yes
6169	P63173	RPL38	60S ribosomal protein L38	110	1.07496	9.88045e-06	247	402	6	6	4.87786e+06	1.0802e+07	155	no	Protein synthesis	yes
6176	P05386	RPLP1	60S acidic ribosomal protein P1	130	1.84873	1.92583e-08	4	23	6	6	3.36019e+06	8.89123e+06	19	no	Protein synthesis	yes
6181	P05387	RPLP2	60S acidic ribosomal protein P2	166	1.49751	8.8166e-05	13	34	5	6	1.69817e+06	3.657e+06	21	no	Mitochondria	yes
6183	O15235	MRPS12	28S ribosomal protein S12, mitochondrial	2	3.64952	0.00918209	0	16	2	6	537859	7.67148e+06	16	no	Mitochondria	yes
6187	P15880	RPS2	40S ribosomal protein S2	143	1.50244	4.86593e-08	393	680	6	6	1.41862e+07	3.38287e+07	287	no	Protein synthesis	yes
6188	P23396	RPS3	40S ribosomal protein S3	200	1.09204	3.22392e-08	1307	1741	6	6	2.57097e+07	3.95172e+07	434	no	Protein synthesis	yes
6189	P61247	RPS3A	40S ribosomal protein S3a	141	1.07836	2.84308e-07	726	1238	6	6	1.79612e+07	4.01006e+07	512	no	Protein synthesis	yes
6191	P62701	RPS4X	40S ribosomal protein S4, X isoform	166	1.03762	3.9253e-08	514	649	6	6	1.70307e+07	3.68162e+07	135	no	Protein synthesis	yes
6193	P46782	RPS5	40S ribosomal protein S5;40S ribosomal protein S5, N-terminally processed	112	1.02863	6.07978e-07	376	656	6	6	2.57589e+07	4.14763e+07	280	no	Protein synthesis	yes
6195	Q15418	RPS6KA1	Ribosomal protein S6 kinase alpha-1	3	1.39458	1.73778e-07	57	148	6	6	1.64326e+06	2.982e+06	91	yes	Undefined	yes
6201	P62081	RPS7	40S ribosomal protein S7	138	1.007	1.48098e-05	338	540	6	6	3.19698e+07	6.09941e+07	202	no	Protein synthesis	yes
6202	P62241	RPS8	40S ribosomal protein S8	163	1.10275	4.90259e-05	250	384	6	6	4.04886e+06	6.7885e+06	134	no	Protein synthesis	yes
6203	P46781	RPS9	40S ribosomal protein S9	114	1.01198	9.63517e-07	408	622	6	6	1.20915e+07	2.55683e+07	214	no	Protein synthesis	yes
6205	P62280	RPS11	40S ribosomal protein S11	101	1.85692	1.58096e-08	170	378	6	6	6.31238e+06	1.61265e+07	208	no	Protein synthesis	yes
6206	P25398	RPS12	40S ribosomal protein S12	94	1.32491	0.000173666	78	105	6	6	4.13352e+06	5.52304e+06	27	no	Protein synthesis	yes
6207	P62277	RPS13	40S ribosomal protein S13	120	1.03201	1.30545e-06	365	692	6	6	1.31836e+07	3.15024e+07	327	no	Protein synthesis	yes
6208	P62263	RPS14	40S ribosomal protein S14	198	1.06583	0.000149599	223	388	6	6	1.43666e+07	3.00037e+07	165	no	Protein synthesis	yes
6209	P62841	RPS15	40S ribosomal protein S15	89	1.8899	0.000139913	81	157	6	6	1.74387e+07	3.3793e+07	76	no	Protein synthesis	yes
6210	P62244	RPS15A	40S ribosomal protein S15a	119	1.26023	6.81397e-06	428	740	6	6	9.27568e+06	1.70554e+07	312	no	Protein synthesis	yes
6217	P62249	RPS16	40S ribosomal protein S16	147	1.07738	2.87177e-05	563	806	6	6	1.04943e+07	2.50633e+07	243	no	Protein synthesis	yes
6218	P08708	RPS17	40S ribosomal protein S17	119	1.40021	9.96264e-09	480	754	6	6	1.41014e+07	2.8788e+07	274	no	Protein synthesis	yes
6222	P62269	RPS18	40S ribosomal protein S18	187	1.5559	9.11012e-07	566	818	6	6	1.62143e+07	3.23508e+07	252	no	Protein synthesis	yes
6224	P60866	RPS20	40S ribosomal protein S20	116	1.41425	7.98808e-07	315	547	6	6	1.34104e+07	2.31309e+07	232	no	Protein synthesis	yes
6227	P63220	RPS21	40S ribosomal protein S21	64	1.98217	0.000209523	7	53	6	6	1.53288e+06	2.64972e+06	46	no	Protein synthesis	yes
6228	P62266	RPS23	40S ribosomal protein S23	107	1.2689	0.000659062	101	229	6	6	1.55945e+07	3.48585e+07	128	no	Protein synthesis	yes
6230	P62851	RPS25	40S ribosomal protein S25	154	1.26999	0.0192576	177	307	6	6	1.54747e+07	3.22169e+07	130	no	Protein synthesis	yes
6231	P62854	RPS26	40S ribosomal protein S26	102	1.3966	0.000646172	36	57	5	6	2.15287e+07	4.98126e+07	21	no	Protein synthesis	yes
6232	P42677	RPS27	40S ribosomal protein S27	131	2.20714	0.000939431	17	32	5	6	2.79735e+06	7.39454e+06	15	no	Protein synthesis	yes
6234	P62857	RPS28	40S ribosomal protein S28	119	1.5095	0.00218874	42	52	6	6	5.41582e+06	1.82799e+07	10	no	Protein synthesis	yes
6389	P31040	SDHA	Succinate dehydrogenase [ubiquinone] flavoprotein subunit, mitochondrial	22	1.20182	8.59139e-06	83	171	6	6	3.57389e+06	6.60217e+06	88	no	Mitochondria	yes
6421	P23246	SFPQ	Splicing factor, proline- and glutamine-rich	133	1.93543	1.2102e-07	173	309	6	6	7.10387e+06	1.35868e+07	136	no	Nuclear	yes
6428	P84103	SRSF3	Serine/arginine-rich splicing factor 3	135	2.74406	5.86386e-07	51	88	6	6	1.19591e+07	2.81655e+07	37	no	Protein synthesis	yes
6447	P05408	SCG5	Neuroendocrine protein 7B2;N-terminal peptide;C-terminal peptide	0	1.68098	5.39312e-05	35	121	6	6	840456	1.87033e+06	86	no	Secreted	yes
64759	Q68CZ2	TNS3	Tensin-3	2	3.32853	3.10862e-14	3	146	6	6	1.38565e+06	4.48288e+06	143	no	Undetermined	yes
64761	Q9H0J9	PARP12	Poly [ADP-ribose] polymerase 12	3	1.21468	0.00763112	1	13	6	5	585422	839023	12	no	Undefined	yes
64784	Q6UUV7	CRTC3	CREB-regulated transcription coactivator 3	0	1.0277	6.16055e-05	17	28	6	6	845239	1.61415e+06	11	no	Nuclear	yes
64928	Q6P1L8	MRPL14	39S ribosomal protein L14, mitochondrial	5	1.40564	7.61533e-07	36	57	6	6	741732	1.98387e+06	21	yes	Mitochondria	yes
64963	P82912	MRPS11	28S ribosomal protein S11, mitochondrial	3	1.48742	0.000705361	0	10	4	4	1.59644e+06	4.13529e+06	10	no	Protein synthesis	yes
64965	P82933	MRPS9	28S ribosomal protein S9, mitochondrial	11	2.53913	0.0131716	0	10	2	3	362964	1.9478e+06	10	no	Mitochondria	yes
64975	Q8IXM3	MRPL41	39S ribosomal protein L41, mitochondrial	10	1.2024	0.000296939	21	38	6	6	217359	755157	17	no	Protein synthesis	yes
6500	P63208	SKP1	S-phase kinase-associated protein 1	95	1.23632	0.00480854	26	47	6	6	2.18814e+06	3.19105e+06	21	no	Degradation	yes
65003	Q9Y3B7	MRPL11	39S ribosomal protein L11, mitochondrial	5	1.08298	4.78471e-05	51	115	6	6	2.21447e+06	4.36092e+06	64	no	Mitochondria	yes
65263	Q53H96	PYCRL	Pyrroline-5-carboxylate reductase 3	4	1.11275	0.0074128	59	81	6	6	1.26759e+06	1.97296e+06	22	no	Nuclear	yes
6576	P53007	SLC25A1	Tricarboxylate transport protein, mitochondrial	32	1.39516	1.10172e-09	181	296	6	6	6.51535e+06	1.34874e+07	115	no	Mitochondria	yes
65993	P82930	MRPS34	28S ribosomal protein S34, mitochondrial	19	1.0804	6.0019e-06	32	48	6	6	415102	1.34646e+06	16	no	Mitochondria	yes
6652	Q00796	SORD	Sorbitol dehydrogenase	6	1.52045	0.00195256	0	10	3	5	235289	693541	10	no	Undetermined	yes
670	Q86WA6	BPHL	Valacyclovir hydrolase	0	1.08574	0.0441263	7	24	3	4	3.0445e+06	5.20012e+06	17	no	Undetermined	yes
6714	P12931	SRC	Proto-oncogene tyrosine-protein kinase Src	13	2.51062	3.18618e-07	6	47	6	6	417251	2.84899e+06	41	yes	ER	yes
6726	P49458	SRP9	Signal recognition particle 9 kDa protein	18	1.76966	1.8874e-06	69	115	6	6	4.47177e+06	1.31615e+07	46	no	Undefined	yes
6727	P37108	SRP14	Signal recognition particle 14 kDa protein	32	1.7636	2.87637e-05	92	294	6	6	9.35145e+06	2.0528e+07	202	no	Protein synthesis	yes
6833	Q09428	ABCC8	ATP-binding cassette sub-family C member 8	0	1.07361	0.00718484	89	110	6	6	1.77338e+06	3.58827e+06	21	no	Plasma Membrane	yes
6850	P43405	SYK	Tyrosine-protein kinase SYK	0	1.53245	0.00375705	11	30	6	6	1.27767e+06	1.94826e+06	19	no	Undetermined	yes
7001	P32119	PRDX2	Peroxiredoxin-2	140	1.05782	0.000797824	25	89	6	6	2.47548e+06	9.09632e+06	64	no	Stress response	yes
7019	Q00059	TFAM	Transcription factor A, mitochondrial	13	1.15967	6.21043e-05	89	161	6	6	2.33439e+06	5.65711e+06	72	no	Mitochondria	yes
708	Q07021	C1QBP	Complement component 1 Q subcomponent-binding protein, mitochondrial	165	1.45456	5.59646e-09	23	56	6	5	5.34058e+06	8.36379e+06	33	no	Plasma Membrane	yes
7145	Q9HBL0	TNS1	Tensin-1	2	1.53242	9.68789e-08	25	95	6	6	814134	2.29124e+06	70	yes	Plasma Membrane	yes
7150	P11387	TOP1	DNA topoisomerase 1	57	1.31591	0.000234125	4	18	6	6	526829	1.05494e+06	14	no	Undefined	yes
7184	P14625	HSP90B1	Endoplasmin	121	2.18345	1.26406e-09	84	251	6	6	1.7602e+06	4.67931e+06	167	no	Folding	yes
7276	P02766	TTR	Transthyretin	0	1.48295	3.04812e-06	274	415	6	6	8.03108e+06	1.6713e+07	141	no	Golgi	yes
7277	P68366	TUBA4A	Tubulin alpha-4A chain	309	1.28509	2.82449e-07	69	97	6	6	9.1499e+06	1.5659e+07	28	no	Cytoskeleton	yes
7284	P49411	TUFM	Elongation factor Tu, mitochondrial	82	1.1763	0.00225161	267	422	6	6	9.51278e+06	1.53685e+07	155	no	Mitochondria	yes
7295	P10599	TXN	Thioredoxin	122	1.22462	0.00453086	85	135	6	6	1.36194e+06	2.98344e+06	50	yes	Folding	yes
7311	P62987	UBA52	Ubiquitin-60S ribosomal protein L40;Ubiquitin;60S ribosomal protein L40	202	1.43146	0.00650462	3	13	3	4	2.39053e+06	8.71106e+06	10	no	Protein synthesis	yes
7317	P22314	UBA1	Ubiquitin-like modifier-activating enzyme 1	63	2.17859	0.0102401	3	27	5	6	2.02741e+07	4.68418e+07	24	no	Degradation	yes
7388	P07919	UQCRH	Cytochrome b-c1 complex subunit 6, mitochondrial	0	1.68706	1.01159e-05	21	38	5	6	9.97473e+06	1.85292e+07	17	no	Mitochondria	yes
7415	P55072	VCP	Transitional endoplasmic reticulum ATPase	115	1.4944	0.000904423	2	29	5	6	831248	6.62904e+06	27	no	ERAD	yes
7531	P62258	YWHAE	14-3-3 protein epsilon	129	1.20006	4.50262e-05	33	51	6	6	6.1177e+06	1.08947e+07	18	no	Mitochondria	yes
7534	P63104	YWHAZ	14-3-3 protein zeta/delta	116	1.28408	7.71613e-05	47	57	6	6	3.86137e+06	6.70013e+06	10	no	Undetermined	yes
7791	Q15942	ZYX	Zyxin	38	1.20018	0.0194103	18	45	5	6	800342	3.27678e+06	27	yes	Undetermined	yes
7795	Q9Y316	MEMO1	Protein MEMO1	0	1.03486	0.0264708	13	53	5	6	127332	276194	40	no	#N/A	yes
7841	Q13724	MOGS	Mannosyl-oligosaccharide glucosidase	7	1.47165	0.000160691	95	193	6	6	2.55791e+06	5.66551e+06	98	no	Metabolism	yes
788	O43772	SLC25A20	Mitochondrial carnitine/acylcarnitine carrier protein	0	1.585	8.576e-05	7	43	6	6	2.29609e+06	3.77101e+06	36	no	Mitochondria	yes
79098	Q9BW04	SARG	Specifically androgen-regulated gene protein	0	1.85775	0.000341987	12	28	5	5	2.51985e+06	3.51951e+06	16	no	Undetermined	yes
79109	Q9BPZ7	MAPKAP1	Target of rapamycin complex 2 subunit MAPKAP1	0	1.12487	0.00209995	5	18	6	6	665118	2.06378e+06	13	no	Undetermined	yes
7913	P35659	DEK	Protein DEK	23	1.17497	3.16271e-06	28	48	6	6	1.12146e+06	1.56523e+06	20	no	Nuclear	yes
7916	P48634	PRRC2A	Protein PRRC2A	38	2.0369	4.20824e-07	22	93	6	6	2.10472e+06	4.51639e+06	71	no	Undetermined	yes
79671	Q86UT6	NLRX1	NLR family member X1	3	1.73111	8.80266e-06	11	25	6	5	462847	1.1328e+07	14	no	Mitochondria	yes
79726	Q6PJI9	WDR59	WD repeat-containing protein 59	5	1.11474	1.75181e-05	4	22	6	6	1.08403e+06	3.19508e+06	18	no	Undetermined	yes
79751	Q9H936	SLC25A22	Mitochondrial glutamate carrier 1	4	1.07831	0.000312887	172	323	6	6	2.60122e+06	5.87895e+06	151	yes	Mitochondria	yes
7991	Q13454	TUSC3	Tumor suppressor candidate 3	1	2.28457	0.00152456	5	26	5	6	832869	1.72462e+06	21	no	ER	yes
80775	Q53S58	TMEM177	Transmembrane protein 177	0	1.30096	1.1951e-06	22	36	6	6	1.24204e+06	2.88102e+06	14	no	Undetermined	yes
8106	Q86U42	PABPN1	Polyadenylate-binding protein 2	24	1.45338	0.000213372	38	60	6	6	3.70766e+06	7.84669e+06	22	no	Nuclear	yes
81567	Q8NBS9	TXNDC5	Thioredoxin domain-containing protein 5	15	1.69362	7.22667e-10	97	206	6	6	2.55215e+06	5.57181e+06	109	no	Folding	yes
81627	Q7Z2T5	TRMT1L	TRMT1-like protein	19	1.38821	0.0046683	10	32	6	6	845428	2.22091e+06	22	no	Nuclear	yes
81855	Q9BWM7	SFXN3	Sideroflexin-3	4	2.25325	8.65012e-08	89	181	6	6	3.69874e+06	6.33057e+06	92	no	Mitochondria	yes
81892	Q9GZT3	SLIRP	SRA stem-loop-interacting RNA-binding protein, mitochondrial	30	1.50023	6.41893e-06	111	215	6	6	4.08262e+06	9.51845e+06	104	no	Mitochondria	yes
81929	Q96EE3	SEH1L	Nucleoporin SEH1	14	1.14563	0.00186727	9	38	6	6	1.6623e+06	3.84651e+06	29	no	Undetermined	yes
830	P47755	CAPZA2	F-actin-capping protein subunit alpha-2	53	1.27736	3.55513e-07	53	102	6	6	2.92175e+06	5.57486e+06	49	no	ER	yes
83939	Q9BY44	EIF2A	Eukaryotic translation initiation factor 2A;Eukaryotic translation initiation factor 2A, N-terminally processed	9	1.65912	9.18253e-09	90	180	6	6	2.20747e+06	5.15427e+06	90	no	Stress response	yes
8407	P37802	TAGLN2	Transgelin-2	96	1.82016	0.000210768	13	40	6	6	1.12752e+06	5.7118e+06	27	no	Cytoskeleton	yes
84171	Q96JB6	LOXL4	Lysyl oxidase homolog 4	0	1.02168	0.0018211	27	65	6	6	1.23198e+06	1.78408e+06	38	no	Secreted	yes
84233	Q9H061	TMEM126A	Transmembrane protein 126A	2	1.78205	4.93156e-08	4	25	6	6	2.02281e+06	5.4762e+06	21	no	Mitochondria	yes
84284	Q9BSD7	NTPCR	Cancer-related nucleoside-triphosphatase	18	1.17845	2.82341e-11	244	328	6	6	3.44241e+06	6.40578e+06	84	no	Undefined	yes
84364	Q8N6H7	ARFGAP2	ADP-ribosylation factor GTPase-activating protein 2	0	2.67803	5.49089e-06	7	47	5	6	913039	3.98398e+06	40	no	Trafficking	yes
84419	Q9C002	NMES1	Normal mucosa of esophagus-specific gene 1 protein	0	1.50107	7.11978e-05	103	121	6	6	2.21052e+07	6.03868e+07	18	no	Nuclear	yes
84681	Q9BX68	HINT2	Histidine triad nucleotide-binding protein 2, mitochondrial	1	1.68331	4.00312e-05	2	25	5	6	1.55996e+06	3.10145e+06	23	no	Mitochondria	yes
84749	Q70CQ3	USP30	Ubiquitin carboxyl-terminal hydrolase 30	0	1.11645	2.02196e-05	16	50	6	6	572360	1.76261e+06	34	no	Degradation	yes
84833	Q96IX5	USMG5	Up-regulated during skeletal muscle growth protein 5	2	1.59488	5.36889e-05	76	150	6	6	6.84489e+06	1.57854e+07	74	no	Mitochondria	yes
84883	Q9BRQ8	AIFM2	Apoptosis-inducing factor 2	0	1.72643	1.03082e-05	4	14	6	6	638908	1.77149e+06	10	yes	Mitochondria	yes
84932	Q8WUD1	RAB2B	Ras-related protein Rab-2B	6	1.02684	0.000618957	9	25	6	6	1.07581e+06	1.83757e+06	16	no	Undetermined	yes
8508	Q9BPW8	NIPSNAP1	Protein NipSnap homolog 1	7	1.33494	3.98479e-07	102	162	6	6	7.18211e+06	1.23377e+07	60	no	Degradation	yes
8525	Q13574	DGKZ	Diacylglycerol kinase zeta	1	1.14688	0.000965844	19	45	6	6	2.09428e+06	2.38482e+06	26	no	Undefined	yes
8826	P46940	IQGAP1	Ras GTPase-activating-like protein IQGAP1	56	1.26763	1.26275e-09	1270	2124	6	6	9.71185e+06	2.02472e+07	854	no	Cytoskeleton	yes
8879	O95470	SGPL1	Sphingosine-1-phosphate lyase 1	5	1.19147	1.95352e-06	90	191	6	6	2.29858e+06	5.82743e+06	101	no	ER	yes
8890	Q9UI10	EIF2B4	Translation initiation factor eIF-2B subunit delta	10	1.05527	6.64915e-05	94	187	6	6	2.18623e+06	3.15012e+06	93	no	Protein synthesis	yes
8894	P20042	EIF2S2	Eukaryotic translation initiation factor 2 subunit 2	0	1.49005	2.62864e-10	187	370	6	6	2.18817e+06	4.56304e+06	183	no	ER	yes
8904	Q99829	CPNE1	Copine-1	14	1.13242	2.69375e-05	63	101	6	6	3.44367e+06	7.49877e+06	38	no	Vesicles	yes
89953	Q9NSK0	KLC4	Kinesin light chain 4	7	1.40773	0.000814329	28	49	6	6	1.00548e+06	2.26379e+06	21	no	Trafficking	yes
9054	Q9Y697	NFS1	Cysteine desulfurase, mitochondrial	2	1.11103	0.000202754	17	37	6	6	843527	2.40249e+06	20	no	Undefined	yes
90580	Q9BSF4	C19orf52	Uncharacterized protein C19orf52	2	1.96419	5.74657e-06	31	50	6	6	1.93584e+06	6.56848e+06	19	no	#N/A	yes
9060	O95340	PAPSS2	Bifunctional 3-phosphoadenosine 5-phosphosulfate synthase 2;Sulfate adenylyltransferase;Adenylyl-sulfate kinase	3	1.1837	8.11054e-07	784	1207	6	6	8.49475e+06	1.39456e+07	423	yes	Mitochondria	yes
9061	O43252	PAPSS1	Bifunctional 3-phosphoadenosine 5-phosphosulfate synthase 1;Sulfate adenylyltransferase;Adenylyl-sulfate kinase	2	1.07916	0.000273968	23	36	6	6	1.08661e+06	2.8473e+06	13	no	Nuclear	yes
9066	O43581	SYT7	Synaptotagmin-7	0	1.47219	0.00969551	3	16	6	6	509072	1.95665e+06	13	no	Trafficking	yes
9126	Q9UQE7	SMC3	Structural maintenance of chromosomes protein 3	28	1.57455	8.60664e-07	4	30	6	5	810275	2.30639e+06	26	no	Secreted	yes
91289	Q9BU23	LMF2	Lipase maturation factor 2	1	1.13821	0.0122291	31	41	6	6	2.94223e+06	6.83207e+06	10	no	Undetermined	yes
9261	P49137	MAPKAPK2	MAP kinase-activated protein kinase 2	6	1.75539	0.000219308	14	31	6	6	853201	2.45111e+06	17	no	Undefined	yes
9276	P35606	COPB2	Coatomer subunit beta	39	1.08495	0.000368387	49	97	6	6	1.85969e+06	3.70654e+06	48	no	Trafficking	yes
92906	Q8WVV9	HNRNPLL	Heterogeneous nuclear ribonucleoprotein L-like	15	1.82938	2.55462e-06	55	114	6	6	2.27284e+06	4.76937e+06	59	no	Undetermined	yes
9349	P62829	RPL23	60S ribosomal protein L23	178	1.32651	7.45786e-07	136	266	6	6	1.26659e+07	2.67682e+07	130	no	Protein synthesis	yes
9352	O43396	TXNL1	Thioredoxin-like protein 1	22	1.11908	0.0072714	29	42	6	6	1.77375e+06	3.79703e+06	13	no	Undetermined	yes
9394	O60243	HS6ST1	Heparan-sulfate 6-O-sulfotransferase 1	0	1.63776	1.31505e-07	1	11	4	6	1.00462e+06	3.40983e+06	10	no	Golgi	yes
94081	Q9H9B4	SFXN1	Sideroflexin-1	17	1.06533	5.42098e-05	187	348	6	6	5.45871e+06	9.73618e+06	161	no	Mitochondria	yes
94097	Q8TD22	SFXN5	Sideroflexin-5	0	1.82171	0.000273327	10	35	6	6	619843	2.03677e+06	25	no	Mitochondria	yes
9414	Q9UDY2	TJP2	Tight junction protein ZO-2	14	3.15642	2.29082e-09	0	19	2	6	706202	1.59172e+06	19	no	Plasma Membrane	yes
9415	O95864	FADS2	Fatty acid desaturase 2	1	1.01223	0.0177494	42	54	5	6	968300	2.02402e+06	12	no	Undetermined	yes
9416	Q9BUQ8	DDX23	Probable ATP-dependent RNA helicase DDX23	32	1.9173	0.0130009	1	32	4	6	327463	3.21905e+07	31	no	Nuclear	yes
9501	Q9UNE2	RPH3AL	Rab effector Noc2	0	1.48095	0.000539756	27	71	6	6	1.79484e+06	3.70935e+06	44	no	Undetermined	yes
9524	Q9NZ01	TECR	Very-long-chain enoyl-CoA reductase	33	1.52659	4.69173e-06	81	205	6	6	3.66362e+06	5.5326e+06	124	no	ER	yes
9553	O75394	MRPL33	39S ribosomal protein L33, mitochondrial	0	1.35087	3.77415e-05	11	22	6	6	917708	2.89407e+06	11	no	Mitochondria	yes
9588	P30041	PRDX6	Peroxiredoxin-6	96	1.12051	0.00321436	17	39	6	6	1.11646e+06	1.71821e+06	22	no	Metabolism	yes
9690	Q15386	UBE3C	Ubiquitin-protein ligase E3C	3	1.51683	1.00013e-05	34	57	6	6	1.19035e+06	3.0987e+06	23	no	Degradation	yes
9692	O15091	KIAA0391	Mitochondrial ribonuclease P protein 3	0	1.12548	0.00743966	2	14	6	6	916127	1.23562e+06	12	no	Mitochondria	yes
9926	Q92604	LPGAT1	Acyl-CoA:lysophosphatidylglycerol acyltransferase 1	1	1.58618	8.07696e-11	92	133	6	6	4.33857e+06	9.61295e+06	41	yes	ER	yes
998	P60953	CDC42	Cell division control protein 42 homolog	37	1.02681	0.0171388	39	67	6	6	6.94899e+06	1.46151e+07	28	no	Plasma Membrane	yes
999	P12830	CDH1	Cadherin-1;E-Cad/CTF1;E-Cad/CTF2;E-Cad/CTF3	0	1.47251	6.30435e-05	15	41	6	6	2.66122e+06	6.94323e+06	26	no	Plasma Membrane	yes
9991	O95758	PTBP3	Polypyrimidine tract-binding protein 3	20	1.51029	8.70922e-05	9	32	5	6	1.69007e+06	3.27334e+06	23	no	Nuclear	yes
